# Supplementary material
Source: MDPI journal article supplement (https://www.mdpi.com/2073-4441/15/8/1459)
Supplement: s1 [file water-2295616-supplementary.xlsx]

## Sheet: Supplementary Table  S1
literature	year	country	Journal	IF	quantile	habitat_type	show trait assignation	used metric (GR)
Angeler, D. G., & W. Goedkoop, 2010. Biological responses to liming in boreal lakes: an assessment using plankton, macroinvertebrate and fish communities. Journal of Applied Ecology 47: 478–486.	2010	Sweden	Journal of Applied Ecology	7.822	Q1	lake	yes, text
Arcifa, M. S., B. B. de Souza, C. S. de Morais-Junior, & C. G. C. Bruno, 2020. Functional groups of rotifers and an exotic species in a tropical shallow lake. Sci Rep 10: 14698.	2020	Brazil	Scientific Reports	5.516	Q2	lake	yes, table	GR
Arias, M. J., P. A. Vaschetto, M. Marchese, L. Regaldo, & A. M. Gagneten, 2022. Benthic Macroinvertebrates and Zooplankton Communities as Ecological Indicators in Urban Wetlands of Argentina. Sustainability 14, 4045.	2022	Argentina	Sustainability	4.089	Q2	wetland	yes, text
Arruda, G. de A., L. P. Diniz, V. L. dos S. Almeida, S. Neumann‐Leitão, & M. de Melo Junior, 2017. Rotifer community structure in fish‐farming systems associated with a Neotropical semiarid reservoir in north‐eastern Brazil. Aquaculture Research 48: 4910–4922.	2017	Brazil	Aquaculture Research	2.447	Q3	reservoir, pond, fish cage	yes, text	GR
Bertani, I., I. Ferrari, & G. Rossetti, 2012. Role of intra-community biotic interactions in structuring riverine zooplankton under low-flow, summer conditions. Journal of Plankton Research 34: 308–320.	2012	Italy	Journal of Plankton Research	2.933	Q2	river	yes, table
Braghin, L. de S. M., B. de A. Almeida, D. C. Amaral, T. F. Canella, B. C. G. Gimenez, & C. C. Bonecker, 2018. Effects of dams decrease zooplankton functional β‐diversity in river‐associated lakes. Freshwater Biology 63: 721–730.	2018	Brazil	Freshwater Biology	4.061	Q1	floodplain	no
Brown, P. D., T. Schröder, J. V. Ríos-Arana, R. Rico-Martinez, M. Silva-Briano, R. L. Wallace, & E. J. Walsh, 2020. Patterns of rotifer diversity in the Chihuahuan desert. Diversity 12: 393.	2022	USA and Mexican Chihuahuan Desert	Hydrobiologia	2.92	Q2	rock pools, cattle tanks, temporary playa	yes, text
Chaparro, G., I. O’Farrell, & T. Hein, 2019. Multi-scale analysis of functional plankton diversity in floodplain wetlands: Effects of river regulation. Science of the Total Environment Elsevier 667: 338–347.	2019	Austria	Science of the Total Environment	10.237	Q1	river	yes, full table of all traits for all taxa in supp
Chen, Q., X. Sun, & H. X. Yu, 2021. Relationship between environmental factors and metazooplankton community structure from Zhalong national nature reserve in Heilong Jiang province, NorthEastern China. Applied Ecology and Environmental Research 19: 2843–2858.	2021	China	Applied Ecology and Environmental Research	0.897	Q4	river, lakes	yes, table
Chen X,Huang K,Zhang Jiexiang,Huang Qi,Liu Ping,Han Boping.Spring community structure of pelagic rotifers in (sub)tropical reservoirs of China: Taxonomic and functional trait-based analysis*. J. Lake Sci.2021,33(5):1490-1499. DOI:10.18307/2021.0517	2021	China	Journal of Lake Sciences	NA	NA	reservoir	no
Coelho, P. N., & R. Henry, 2022. Is the littoral zone taxonomically and functionally more diverse? Investigating the rotifer community of a tropical shallow lake. Limnology 23, 429–440. https://doi.org/10.1007/s10201-022-00697-z	2022	Brazil	Limnology	2.1	Q3	lake	yes, full table of all traits for all taxa in supp
de Paggi, S. B. J., M. Devercelli, & F. R. Molina, 2014. Zooplankton and their driving factors in a large subtropical river during low water periods. Fundamental and Applied Limnology Schweizerbart’sche Verlagsbuchhandlung 184: 125–139.	2014	Brazil	Fundamental and Applied Limnology	1.267	Q3	river	yes, text
Deosti, S., F. de Fátima Bomfim, F. M. Lansac-Tôha, B. A. Quirino, C. C. Bonecker, & F. A. Lansac-Tôha, 2021. Zooplankton taxonomic and functional structure is determined by macrophytes and fish predation in a Neotropical river. Hydrobiologia 848: 1475–1490.	2021	Brazil	Hydrobiologia	2.92	Q2	river	no
Duré, G. A. V., N. R. Simões, L. de S. M. Braghin, & S. M. M. S. Ribeiro, 2021. Effect of eutrophication on the functional diversity of zooplankton in shallow ponds in Northeast Brazil. Journal of Plankton Research 43: 894–907.	2021	Brazil	Journal of Plankton Research	2.933	Q2	pond	no
Espinosa-Rodríguez, C. A., S. S. S. Sarma, & S. Nandini, 2021. Zooplankton community changes in relation to different macrophyte species: Effects of Egeria densa removal. Ecohydrology & Hydrobiology 21: 153–163.	2021	Mexico	Ecohydrology and Hydrobiology	3.1	Q2	reservoir	no
Fintelman-Oliveira, E., C. Kruk, G. Lacerot, G. Klippel, & C. W. C. Branco, 2022. Zooplankton functional groups in tropical reservoirs: discriminating traits and environmental drivers. Hydrobiologia 850: 1–20.	2022	Brazil	Hydrobiologia	2.92	Q2	reservoir	no
Frau, D., M. F. Gutierrez, F. R. Molina, & F. T. de Mello, 2021. Drivers assessment of zooplankton grazing on phytoplankton under different scenarios of fish predation and turbidity in an in situ mesocosm experiment. Hydrobiologia 848: 485–498.	2021	Argentina	Hydrobiologia	2.92	Q2	river	yes, text
Gadelha, E. S., B. Dunck, N. R. SimoeS, E. T. Paes, & A. Akama, 2023. High taxonomic turnover and functional homogenization of rotifer communities in an amazonian river. Anais da Academia Brasileira de Ciências 94(3): e20201894 DOI 10.1590/0001-3765202220201894	2022	Brazil	Annals of the Brazilian Academy of Sciences	NA	NA	river	no
Galir Balkić, A., I. Ternjej, & M. Špoljar, 2018. Hydrology driven changes in the rotifer trophic structure and implications for food web interactions. Ecohydrology 11: e1917.	2018	Croatia	Ecohydrology	3.369	Q2	lake	yes, table
Galir Balkić, A. G., 2019. The importance of environmental differences in the structuring of rotifer functional diversity. Journal of Limnology 78 (3). https://doi.org/10.4081/jlimnol.2019.1903.	2019	Croatia	Journal of Limnology	1.803	Q4	river, lakes	no
Gavrilko, D. E., G. V. Shurganova, I. A. Kudrin, & B. N. Yakimov, 2021. Identification of Freshwater Zooplankton Functional Groups Based on the Functional Traits of Species. Biology Bulletin 48: 1849–1856.	2020	European Russia	Biology Bulletin	0.534	Q4		no
Goździejewska, A. M., M. Gwoździk, S. Kulesza, M. Bramowicz, & J. Koszałka, 2019. Effects of suspended micro-and nanoscale particles on zooplankton functional diversity of drainage system reservoirs at an open-pit mine. Scientific Reports 9: 1–13.	2019	Poland	Scientific Reports	5.516	Q2	reservoir	no	GR
Goździejewska, A. M., J. Koszałka, R. Tandyrak, J. Grochowska, & K. Parszuto, 2021. Functional responses of zooplankton communities to depth, trophic status, and ion content in mine pit lakes. Hydrobiologia 848: 2699–2719.	2021	Poland	Hydrobiologia	2.92	Q2	lake	yes, table	GR
Gu, Y., Q. Cai, L. Tan, B. Li, S. Ju, & L. Ye, 2021. Taxonomic and functional diversity of planktonic rotifers along a phosphorus gradient in the Three Gorges Reservoir, China. Fresenius Environmental Bulletin 30: 1687–1695.	2021	China	Fresenius Environmental Bulletin	0.583	Q4	reservoir	no
Gutierrez, M. F., N. R. Simões, D. Frau, M. Saigo, & M. Licursi, 2020. Responses of stream zooplankton diversity metrics to eutrophication and temporal environmental variability in agricultural catchments. Environmental Monitoring and Assessment 192: 1–17.	2020	Argentina	Environmental Monitoring and Assessment	3.42	Q3	river	no
Gutierrez, M. F., L. B. Epele, G. Mayora, D. Aquino, C. Mora, R. Quintana, & L. Mesa, 2022. Hydro-climatic changes promote shifts in zooplankton composition and diversity in wetlands of the Lower Paraná River Delta. Hydrobiologia 849, 3463–3480	2022	Argentina	Hydrobiologia	2.92	Q2	river	no
Gutierrez, M. F., Ü. N. Tavşanoğlu, N. Vidal, J. Yu, F. Teixeira-de Mello, A. I. Çakiroglu, H. He, Z. Liu, & E. Jeppesen, 2018. Salinity shapes zooplankton communities and functional diversity and has complex effects on size structure in lakes. Hydrobiologia 813: 237–255.	2018	China	Hydrobiologia	2.92	Q2	lake	yes, table	GR
Işkın, U., N. Filiz, Y. Cao, É. M. Neif, B. Öğlü, T. L. Lauridsen, T. A. Davidson, M. Søndergaard, Ü. N. Tavşanoğlu, & M. Beklioğlu, 2020. Impact of nutrients, temperatures, and a heat wave on zooplankton community structure: an experimental approach. Water 12: 3416.	2020	Denmark	Water	3.628	Q2	mesocosm	yes, text
Jansson, A., R. Klais‐Peets, E. Grinienė, G. Rubene, A. Semenova, A. Lewandowska, & J. Engström‐Öst, 2020. Functional shifts in estuarine zooplankton in response to climate variability. Ecology and Evolution 10: 11591–11606.	2020	Finnland	Ecology and Evolution	3.445	Q2	Baltic Sea	yes, table
Josué, I. I., E. O. Sodré, R. B. Setubal, S. J. Cardoso, F. Roland, M. P. Figueiredo‐Barros, & R. L. Bozelli, 2021. Zooplankton functional diversity as an indicator of a long‐term aquatic restoration in an Amazonian lake. Restoration Ecology 29: e13365.	2021	Brazil	Restoration Ecology	4.241	Q2	lake	yes, table as supplementary material
Krztoń, W., J. Kosiba, & E. Wilk-Woźniak, 2022. Features that matter: studying how phytoplankton drives zooplankton community functional traits. Hydrobiologia 849, 2647–2662 (2022). https://doi.org/10.1007/s10750-022-04863-3	2021	Poland	Hydrobiologia	2.92	Q2	lake, ponds	yes, table as supplementary material
Krztoń, W., & J. Kosiba, 2020. Variations in zooplankton functional groups density in freshwater ecosystems exposed to cyanobacterial blooms. Science of the Total Environment Elsevier 730: 139044.	2020	Poland	Science of the Total Environment	10.237	Q1	lake	yes, table as supplementary material
Kuczyńska-Kippen, N., M. Špoljar, C. Zhang, & M. Pronin, 2020. Zooplankton functional traits as a tool to assess latitudinal variation in the northern-southern temperate European regions during spring and autumn seasons. Ecological Indicators 117: 106629.	2020	Poland + Croatia	Ecological Indicators	6.643	Q1	lake	no
Labuce, A., A. Ikauniece, I. Jurgensone, & J. Aigars, 2021. Environmental Impacts on Zooplankton Functional Diversity in Brackish Semi-Enclosed Gulf. Water 13: 1881.	2021	Latvia	Water	3.628	Q2	Baltic Sea	yes, table
Lansac-Tôha, F. M., J. Heino, L. M. Bini, O. Peláez, M. T. Baumgartner, B. A. Quirino, A. Pineda, B. R. Meira, F. M. Florêncio, & F. R. Oliveira, 2022. Cross-Taxon Congruence of Taxonomic and Functional Beta-Diversity Facets Across Spatial and Temporal Scales. Frontiers in Environmental Science Frontiers 10: 903074.	2022	Brazil	Frontiers in Environmental Sciences	4.75		floodplain	no
Lokko, K., & T. Virro, 2014. The structure of psammic rotifer communities in two boreal lakes with different trophic conditions: Lake Võrtsjärv and Lake Saadjärv (Estonia). Oceanological and Hydrobiological Studies 43: 49–55.	2014	Estonia	Oceanological and Hydrobiological Studies	0.91	Q4	lakes	yes, text	GR
Lokko, K., T. Virro, & J. Kotta, 2017. Seasonal variability in the structure and functional diversity of psammic rotifer communities: role of environmental parameters. Hydrobiologia 96: 287–307.	2017	Estonia	Hydrobiologia	2.92	Q2	lake, Baltic Sea	yes, text	GR
Moi, D. A., G. Q. Romero, E. Jeppesen, P. Kratina, D. C. Alves, P. A. Antiqueira, F. Teixeira de Mello, B. R. Figueiredo, C. C. Bonecker, & A. P. Pires, 2022. Regime shifts in a shallow lake over 12 years: Consequences for taxonomic and functional diversities, and ecosystem multifunctionality. Journal of Animal Ecology 91: 551–565.	2021	Brazil	Journal of Animal Ecology	5.657	Q1	lake	no
Moreira, F. W. A., M. G. P. Leite, M. A. G. Fujaco, F. P. C. Mendonça, L. P. Campos, & E. M. Eskinazi-Sant’Anna, 2016. Assessing the impacts of mining activities on zooplankton functional diversity. Acta Limnologica Brasiliensia 28, e7 http://dx.doi.org/10.1590/S2179-975X0816	2016	Brazil	Acta Limnologica Brasiliensia	NA	NA	reservoir	yes, table	GR
Mwagona, P. C., M. Chengxue, & Y. Hongxian, 2018. Seasonal dynamics of Zooplankton functional groups in relation to environmental variables in Xiquanyan Reservoir, Northeast China. Annales de Limnologie-International Journal of Limnology: 54, 33	2018	China	International Journal of Limnology	1.242	Q4	reservoir	yes, table
Neury-Ormanni, J., J. Vedrenne, M. Wagner, G. Jan, & S. Morin, 2020. Micro-meiofauna morphofunctional traits linked to trophic activity. Hydrobiologia 847: 2725–2736.	2020	France	Hydrobiologia	2.92	Q2	pond	yes, supplementary material
Obertegger, U., H. A. Smith, G. Flaim, & R. L. Wallace, 2011. Using the guild ratio to characterize pelagic rotifer communities. Hydrobiologia 662: 157–162.	2011	Italy & USA	Hydrobiologia	2.92	Q2	lake	yes, text	GR
Obertegger, U., & M. Manca, 2011. Response of rotifer functional groups to changing trophic state and crustacean community. Journal of Limnology 70: 231-38. https://doi.org/10.4081/jlimnol.2011.231.	2011	Italy	Journal of Limnology	1.673	Q4	lake	yes, text	GR
Obertegger, U., & G. Flaim, 2015. Community assembly of rotifers based on morphological traits. Hydrobiologia 753: 31–45.	2015	Italy	Hydrobiologia	2.92	Q2	lake	yes, table
Obertegger, U., & G. Flaim, 2018. Taxonomic and functional diversity of rotifers, what do they tell us about community assembly? Hydrobiologia 823: 79–91.	2018	Italy	Hydrobiologia	2.92	Q2	lake	yes, full table of all traits for all taxa in supp
O’Brien, D. A., G. Gal, S. J. Thackeray, S. M. Shin-ichiro, J. Blanchard, & C. F. Clements, 2023. Planktonic functional diversity changes in synchrony with lake ecosystem state. Global Change Biology https://doi.org/10.1111/gcb.16485	2023	UK	Global Change Biology	13.111	Q1	lake	no
Oh, H.-J., H.-G. Jeong, G.-S. Nam, Y. Oda, W. Dai, E.-H. Lee, D. Kong, S.-J. Hwang, & K.-H. Chang, 2017. Comparison of taxon-based and trophi-based response patterns of rotifer community to water quality: applicability of the rotifer functional group as an indicator of water quality. Animal Cells and Systems 21: 133–140.	2017	South Korae	Animal Cells and Systems	1.727	Q1	reservoir	yes, text
Palazzo, F., F. F. Bomfim, J. D. Dias, N. R. Simões, F. A. Lansac‐Tôha, & C. C. Bonecker, 2021. Temporal dynamics of rotifers’ feeding guilds shaped by chlorophyll‐a, nitrate, and environmental heterogeneity in subtropical floodplain lakes. International Review of Hydrobiology 106: 95–105.	2021	Brazil	International Review of Hydrobiology	2.241	Q3	lake	yes, figure
Pinel-Alloul, B., A. Chemli, Z. E. Taranu, & A. Bertolo, 2022. Using the Diversity, Taxonomic and Functional Attributes of a Zooplankton Community to Determine Lake Environmental Typology in the Natural Southern Boreal Lakes (Québec, Canada). Water 14: 578.	2022	Canada	Water	3.628	Q2	lake	yes, table
Porcel, S., G. Chaparro, M. C. Marinone, J. F. Saad, J. Lancelotti, & I. Izaguirre, 2020. The role of environmental, geographical, morphometric and spatial variables on plankton communities in lakes of the arid Patagonian plateaus. Journal of Plankton Research 42: 173–187.	2020	Argentina	Journal of Plankton Research	2.933	Q2	lake	yes, full table of all traits for all taxa in supp
Pothoven, S. A., & H. A. Vanderploeg, 2022. Factors affecting rotifer assemblages along a nearshore to offshore transect in southeastern Lake Michigan. Journal of Great Lakes Research 48: 1230-1238.	2021	USA	Journal of Great Lakes Research	3.382	Q1	lake	yes, text	GR
Qian, F.-P., X.-L. Wen, & Y.-L. Xi, 2022. Seasonal variations of rotifer communities in three climatic zones: effects of environmental parameters on changes of functional groups. Limnology 23, 165–180. https://doi.org/10.1007/s10201-021-00681-z	2022	China	Limnology	2.1	Q3	lake	yes for trophi, no for corona types
Ribeiro, B. I. O., L. de S. M. Braghin, F. M. Lansac-Tôha, F. F. Bomfim, B. A. Almeida, C. C. Bonecker, & F. A. Lansac-Tôha, 2022. Environmental heterogeneity increases dissimilarity in zooplankton functional traits along a large Neotropical river. Hydrobiologia 849, 3135–3147. https://doi.org/10.1007/s10750-022-04917-6	2022	Brazil	Hydrobiologia	2.92	Q2	river	no
Ríos-Arana, J. V., L. del Carmen Agüero-Reyes, R. L. Wallace, & E. J. Walsh, 2019. Limnological characteristics and rotifer community composition of Northern Mexico Chihuahuan Desert Springs. Journal of Arid Environments 160: 32–41.	2019	Mexico	Journal of Arid Environments	2.837	Q3	springs	yes, text	GR
Smith, H. A., J. Ejsmont-Karabin, T. M. Hess, & R. L. Wallace, 2009. Paradox of planktonic rotifers: similar structure but unique trajectories in communities of the Great Masurian Lakes (Poland). Internationale Vereinigung für theoretische und angewandte Limnologie: Verhandlungen 30: 951–956.	2009	Poland	Verh. Internat. Verein. Limnol.			lake	yes, text	GR
Špoljar, M., I. Habdija, B. Primc‐Habdija, & L. Sipos, 2005. Impact of environmental variables and food availability on rotifer assemblage in the karstic barrage Lake Visovac (Krka River, Croatia). International Review of Hydrobiology: 90: 555–579.	2005	Croatia	Internat. Rev. Hydrobiol.	2.241	Q3	lake	no
Stamenković, O., M. Stojković Piperac, D. Čerba, D. Milošević, A. Ostojić, N. B. Đorđević, S. B. Simić, D. Cvijanović, & O. Y. Buzhdygan, 2022. Taxonomic and functional aspects of diversity and composition of plankton communities in shallow lentic ecosystems along the human impact and environmental gradients. Aquatic Sciences 84: 1–19.	2022	Croatia	Aquatic Sciences	3.042	Q2	pond	no
Sun, X., F. Y. Chai, P. C. Mwagona, I. E. Shabani, W. J. Hou, X. Y. Li, C. X. Ma, H. F. Pan, S. Li, & H. X. Yu, 2019. Seasonal variations of zooplankton functional groups and relationship with environmental factors in a eutrophic reservoir from cold region. Applied Ecology and Environmental Research 17: 7727–7740.	2019	China	Applied Ecology and Environmental Research	0.897	Q4	reservoir	yes, table
Tasevska, O., M. Špoljar, D. Gušeska, G. Kostoski, S. Patcheva, & E. Veljanoska Sarafiloska, 2017. Zooplankton in ancient and oligotrophic Lake Ohrid (Europe) in association with environmental variables. Croatian Journal of Fisheries 75: 95–103.	2017	North Macedonia	Croatian Journal of Fisheries	NA	NA	lake	yes, text
Tavsanoglu, U. N., & N. E. Akbulut, 2019. Seasonal Dynamics of Riverine Zooplankton Functional Groups in Turkey: Kocaçay Delta as a Case Study. Turkish Journal of Fisheries and Aquatic Sciences 20: 69–77.	2019	Turkey	Turkish Journal of Fisheries and Aquatic Sciences	1.443	Q3	river delta	yes, table
Tian, X., Yuan, Y., Zou, Y., Qin, L., Zhu, X., Zhu, Y., Zhao, Y., Jiang, M. and Jiang, M., 2023. Cyanobacterial Blooms Increase Functional Diversity of Metazooplankton in a Shallow Eutrophic Lake. Water, 15(5), p.953.	2023	China	Water	3.628	Q2	lake	no
Virro, T., J. Haberman, M. Haldna, & K. Blank, 2009. Diversity and structure of the winter rotifer assemblage in a shallow eutrophic northern temperate Lake Võrtsjärv. Aquatic Ecology 43: 755–764.	2009	Estonia	Aquatic Ecology	2.844	Q2	lake	no
Wang, Q., K. Feng, X. Du, J. Yuan, J. Liu, & Z. Li, 2022b. Effects of land use and environmental gradients on the taxonomic and functional diversity of rotifer assemblages in lakes along the Yangtze River, China. Ecological Indicators 142: 109199.	2022	China	Ecological Indicators	6.643	Q1	lake	no
Wang, H., T. Huo, X. Du, L. Wang, D. Song, X. Huang, & C. Zhao, 2022a. Zooplankton community and its environmental driving factors in Ulungur Lake, China. Journal of Freshwater Ecology 37: 387–403.	2022	China	Journal of Freshwater Ecology	1.86	Q4	lake	no
Wu, L., L. Ji, X. Chen, J. Ni, Y. Zhang, & M. Geng, 2022. Distribution of Zooplankton Functional Groups in the Chaohu Lake Basin, China. Water 14: 2106.	2022	China	Water	3.628	Q2	lake	yes, table as supplementary material
Zhao, K., L. Wang, Q. You, J. Zhang, W. Pang, & Q. Wang, 2022. Impact of cyanobacterial bloom intensity on plankton ecosystem functioning measured by eukaryotic phytoplankton and zooplankton indicators. Ecological Indicators 140: 109028.	2022	China	Ecological Indicators	6.643	Q1	lake	no

## Sheet: Supplementary Table S2
genus	family	habitat	habitat coding summarizing information	trophi type	lorica	defence	foot	corona*	feeding mode sensu Smith et al. (2009)	trophic groups sensu Karabin (1985)	feeding mechanism sensu Monakov (1976)	feeding-niche categories sensu Gilbert (2022)	feeding types sensu Monakov (1976)	size of ingested particles after Monakov (1976)	feeding types sensu Palazzo (2020)	literature to fill missing information on feeding traits
Abrochtha	Philodinavidae	littoral, periphytic [16]	littoral, periphytic	ramate	illoricate	no	yes	Abrochtha-type [16, 40]	n.d.	Microfilter-feeders; sedimentators	ciliary movement creates strong currents concentrating food	predator	zoophages	macrophages	filter feeders	[16]
Acyclus	Atrochidae	sessile; mostly present in colonies of Sinantheria socialis [16]	epibiont	uncinate	illoricate	yes	yes	absent in adult state [23]	Raptorial	Microfilter-feeders; sedimentators	active capture	predator	zoophages	macrophages	suctor feeder	[22]
Adineta	Adinetidae	littoral, periphytic benthic genus rarely or never in plankton [43]; limnoterrestial [16]	littoral, periphytic	ramate	illoricate	no	yes	Adineta-type [16]	n.d.	Microfilter-feeders; sedimentators	ciliary movement creates strong currents concentrating food	Microphagous rotifers	trypto-bacterio	microphages	filter feeders	[13]
Allodicranophorus	Dicranophoridae	sublittoral, psammon [9]	littoral, periphytic	forcipate	illoricate	no	yes	Notommata-type [27]	Raptorial	not defined sensu Karabin	active capture				predator
Albertia	Dicranophoridae	obligate parasite [16]	endobiont	forcipate	illoricate	no	yes	Notommata-type [27]	Raptorial	not defined sensu Karabin	active capture	parasite; not defined	parasite; not defined	parasite; not defined	predator	[5]
Anchistestudinella	Testudinellidae	littoral [28]	littoral, periphytic	malleoramate	illoricate	no	yes	Hexarthra-type [16]	Microphagous	Microfilter-feeders; sedimentators	ciliary movement creates strong currents concentrating food				filter feeders	[1]
Anomopus	Philodinidae	epizoic; marine [16]	epibiont	ramate	illoricate	no	yes	Philodina-type [16, 40]	n.d.	Microfilter-feeders; sedimentators	ciliary movement creates strong currents concentrating food				filter feeders	[47]
Anuraeopsis	Brachionidae	planktonic or semi-planktonic [43]	planktonic or semi-planktonic	malleate	loricate	no	no	Euchlanis-Brachionus-type [16]	Microphagous	Microfilter-feeders; sedimentators	ciliary movement creates strong currents concentrating food	Microphagous rotifers	trypto-bacteriophages	microphages	filter feeders	[36]
Asciaporrecta	Asciaporrectidae	parasite/predator feeding on the plasma of its host [7]	endobiont	forcipate	illoricate	no	yes	Notommata-type [7]	Raptorial	not defined sensu Karabin	active capture	parasite; not defined	parasite; not defined	parasite; not defined	predator	[7]
Ascomorpha	Gastropodidae	planktonic or semi-planktonic [16]	planktonic or semi-planktonic	virgate	loricate	no	no	Asplanchna-type [16]	Raptorial	Macrofilter-feeders; raptors	active capture	Macrophagous algivores	phytophages	macrophages	suctor feeder	[35]
Ascomorphella	Trichocercidae	endoparasite in several species of the freshwater colonial green alga Volvox and the golden algae Uroglena and Uroglenopsis [16]	endobiont	virgate	illoricate	no	yes	Asplanchna-type [16]	Raptorial	Macrofilter-feeders; raptors	active capture	parasite; not defined	parasite; not defined	parasite; not defined	suctor feeder	[17]
Aspelta	Dicranophoridae	sediment dwelling - littoral [16]	littoral, periphytic	forcipate	illoricate	no	yes	Notommata-type [27]	Raptorial	not defined sensu Karabin	active capture	predator	zoophages	macrophages	predator	[5, 28]
Asplanchna	Asplanchnidae	planktonic or semi-planktonic [43]	planktonic or semi-planktonic	incudate	illoricate	no	no	Asplanchna-type [16]	Raptorial	Asplanchna	active capture	Macrophagous omnivores/predators	zoophages	macrophages	predator	[18]
Asplanchnopus	Asplanchnidae	littoral or periphytic; sometimes in plankton [43]	littoral or periphytic; sometimes in plankton	incudate	illoricate	no	yes	Asplanchna-type [16]	Raptorial	macrofilter-feeders; raptors	active capture	predator	zoophages	macrophages	predator	[32, 35]
Atrochus	Atrochidae	littoral or periphytic [16]	littoral, periphytic	uncinate	illoricate	no	yes	absent in adult state [23]	Raptorial	Microfilter-feeders; sedimentators	active capture		phytophages-zoophages	macrophages	suctor feeder	[13, 28]
Balatro	Dicranophoridae	obligate parasite [16]	endobiont	forcipate	illoricate	no	yes	absent in adult state [28]	Raptorial	not defined sensu Karabin	active capture	parasite; not defined	parasite; not defined	parasite; not defined	predator	[5]
Beauchampia	Flosculariidae	littoral, periphytic benthic genus rarely or never in plankton [43]	littoral, periphytic	malleoramate	illoricate	no	yes	Hexarthra-type [16]	Microphagous	Microfilter-feeders; sedimentators	infundibulum for enclosing & ingesting food				filter feeders
Beauchampiella	Euchlanidae	littoral or periphytic; sometimes in plankton [43]	littoral or periphytic; sometimes in plankton	malleate	illoricate	no	yes	Euchlanis-Brachionus-type [16]	Microphagous	Microfilter-feeders; sedimentators	ciliary movement creates strong currents concentrating food				filter feeders
Birgea	Birgeidae	littoral or periphytic; sometimes in plankton [19]	littoral or periphytic; sometimes in plankton	virgate	illoricate	no	yes	Notommata-type [15, 27]	Raptorial	Macrofilter-feeders; raptors	active capture		phytophages	microphages	n.d.	[21]
Brachionus	Brachionidae	planktonic or semi-planktonic [43]	planktonic or semi-planktonic	malleate	loricate	yes	no	Euchlanis-Brachionus-type [16]	Microphagous	Microfilter-feeders; sedimentators	ciliary movement creates strong currents concentrating food	Polyphagous rotifers	trypto-bacterio-phytophages	macrophages	filter feeders
Bradyscela	Adinetidae	limnoterrestrial [12]	limnoterrestial	ramate	illoricate	no	yes	Adineta-type [16, 40]	n.d.	Microfilter-feeders; sedimentators	ciliary movement creates strong currents concentrating food	Microphagous rotifers		microphages	filter feeders
Bryceella	Proalidae	littoral, periphytic; rarely or never in plankton [4, 28]	littoral, periphytic	malleate	loricate	no	yes	Notommata-type [15, 27]	Microphagous	Microfilter-feeders; sedimentators	ciliary movement creates strong currents concentrating food			microphages	filter feeders	[4]
Cephalodella	Notommatidae	planktonic or semi-planktonic [43]; periphytic benthic genus [46]	planktonic or semi-planktonic	virgate	illoricate	no	no	Notommata-type [27]	Raptorial	Macrofilter-feeders; raptors	active capture	Macrophagous omnivores/predators	phytophages-zoophages	macrophages	suctor feeder
Ceratotrocha	Philodinidae	limnoterrestrial [12]	limnoterrestial	ramate	illoricate	yes	yes	Philodina-type [16, 40]	n.d.	Microfilter-feeders; sedimentators	ciliary movement creates strong currents concentrating food				filter feeders	[12]
Claria	Clariaidae	obligate parasite [16]	endobiont	virgate	illoricate	no	yes	absent in adult state [16]	Raptorial	Macrofilter-feeders; raptors	active capture	parasite; not defined	parasite; not defined	parasite; not defined	n.d.	[45]
Collotheca	Collothecidae	planktonic or semi-planktonic [43]; predominantly benthic-periphytic, a few planktonic species [16]	littoral, periphytic	uncinate	illoricate	yes	yes	Collotheca-type [16]	Raptorial	Microfilter-feeders; sedimentators	infundibulum for enclosing & ingesting food	Macrophagous algivores	phytophages-zoophages	macrophages	suctor feeder
Colurella	Lepadellidae	littoral or periphytic; sometimes in plankton [43]	littoral or periphytic; sometimes in plankton	malleate	loricate	no	yes	Euchlanis-Brachionus-type [16]	Microphagous	Microfilter-feeders; sedimentators	ciliary movement creates strong currents concentrating food	Microphagous rotifers	bacterio-phytophages	microphages	filter feeders	[31]
Conochilopsis	Conochilidae	planktonic or semi-planktonic [43]	planktonic or semi-planktonic	malleoramate	illoricate	yes	yes	Conochilus-type [16]	Microphagous	Microfilter-feeders; sedimentators	ciliary movement creates strong currents concentrating food				filter feeders
Conochilus	Conochilidae	planktonic or semi-planktonic [43]	planktonic or semi-planktonic	malleoramate	illoricate	yes	yes	Conochilus-type [16]	Microphagous	Microfilter-feeders; sedimentators	ciliary movement creates strong currents concentrating food	Microphagous rotifers	trypto-bacteriophages	microphages	filter feeders
Coronistomus	Coronistomidae	sediment dwelling - littoral [37]	littoral, periphytic	ramate	illoricate	no	yes	Abrochtha-type [37]	n.d.	Microfilter-feeders; sedimentators	ciliary movement creates strong currents concentrating food	Microphagous rotifers		microphages	filter feeders	[37]
Cotylegaleata	Cotylegaleatidae	littoral, periphytic; rarely or never in plankton [10]	littoral, periphytic	virgate	loricate	no	yes	Notommata type [28]	Raptorial	Macrofilter-feeders; raptors	active capture	predator	zoophages	macrophages	suctor feeder	[9]
Cupelopagis	Atrochidae	littoral, periphytic benthic genus rarely or never in plankton [14]	littoral, periphytic	uncinate	illoricate	no	yes	absent in adult state [16]	Raptorial	Microfilter-feeders; sedimentators	active capture	predator	phytophages-zoophages	macrophages	suctor feeder	[2]
Cyrtonia	Epiphanidae	littoral, periphytic; rarely or never in plankton [43]; littoral of small water bodies [28]	littoral, periphytic	malleate	illoricate	no	yes	Euchlanis-Brachionus-type [16]	Microphagous	Microfilter-feeders; sedimentators	ciliary movement creates strong currents concentrating food				filter feeders
Dicranophoroides	Dicranophoridae	littoral, periphytic [5]	littoral, periphytic	forcipate	illoricate	no	yes	Notommata-type [27]	Raptorial	not defined sensu Karabin	active capture	not defined sensu Gilbert; feeding via endosybiotic algae in the gut	phytophages		predator	[5]
Dicranophorus	Dicranophoridae	planktonic or semi-planktonic [43]	planktonic or semi-planktonic	forcipate	illoricate	no	yes	Notommata-type [27]	Raptorial	not defined sensu Karabin	active capture	Macrophagous omnivores/predators	zoophages	macrophages	predator	[5]
Didymodactylus	Philodinidae	littoral, periphytic; rarely or never in plankton [16]	littoral, periphytic	ramate	illoricate	no	yes	Philodina-type [16, 40]	n.d.	Microfilter-feeders; sedimentators	ciliary movement creates strong currents concentrating food				filter feeders
Dipleuchlanis	Euchlanidae	littoral, periphytic; rarely or never in plankton [16]	littoral, periphytic	malleate	loricate	no	yes	Euchlanis-Brachionus-type [16]	Microphagous	Microfilter-feeders; sedimentators	ciliary movement creates strong currents concentrating food	Microphagous rotifers	phytophages	microphages	filter feeders	[33]
Diplois	Euchlanidae	littoral, periphytic; rarely or never in plankton [16]	littoral, periphytic	malleate	loricate	no	yes	Euchlanis-Brachionus-type [16]	Microphagous	Microfilter-feeders; sedimentators	ciliary movement creates strong currents concentrating food				filter feeders
Dissotrocha	Philodinidae	littoral, periphytic; rarely or never in plankton [16]	littoral, periphytic	ramate	illoricate	no	yes	Philodina-type [16, 40]	n.d.	Microfilter-feeders; sedimentators	ciliary movement creates strong currents concentrating food				filter feeders	[41]
Donneria	Dicranophoridae	littoral, psammic; never in plankton [6]	littoral, periphytic	forcipate	illoricate	yes	yes	Notommata-type [27]	Raptorial	not defined sensu Karabin	active capture	predator	zoophages	macrophages	predator	[5]
Dorria	Dicranophoridae	littoral, periphytic [28]	littoral, periphytic	virgate	illoricate	no	yes	Notommata-type [27]	Raptorial	Macrofilter-feeders; raptors	active capture				predator
Dorystoma	Notommatidae	littoral, periphytic [16]	littoral, periphytic	virgate	illoricate	no	yes	Notommata-type [27]	Raptorial	Macrofilter-feeders; raptors	active capture	Macrophagous algivores	phytophages	macrophages	suctor feeder	[28, 34]
Drilophaga	Notommatidae	obligate parasite [16]	endobiont	virgate	illoricate	no	yes	Notommata-type [27]	Raptorial	Macrofilter-feeders; raptors	active capture	parasite; not defined	parasite; not defined	parasite; not defined	suctor feeder	[34]
Elosa	Trichocercidae	littoral or periphytic; sometimes in plankton [16]	littoral or periphytic; sometimes in plankton	virgate	loricate	no	no	Asplanchna-type [16]	Raptorial	Macrofilter-feeders; raptors	active capture				suctor feeder
Embata	Philodinidae	littoral, periphytic benthic genus rarely or never in plankton [43]; limnoterrestial; epizoic [16]	littoral, periphytic	ramate	illoricate	no	yes	Philodina-type [16, 40]	n.d.	Microfilter-feeders; sedimentators	ciliary movement creates strong currents concentrating food	Microphagous rotifers	trypto-bacterio	microphages	filter feeders	[41]
Encentrum	Dicranophoridae	littoral, periphytic benthic genus rarely or never in plankton [43]	littoral, periphytic	forcipate	illoricate	no	yes	Notommata-type [27]	Raptorial	not defined sensu Karabin	active capture	Macrophagous omnivores/predators	trypto-bacterio-phytophages, zoophages	macrophages	predator	[5]
Enteroplea	Notommatidae	littoral or periphytic; sometimes in plankton [34]	littoral or periphytic; sometimes in plankton	virgate	illoricate	no	yes	Notommata-type [27]	Raptorial	Macrofilter-feeders; raptors	active capture	predator	zoophages	macrophages	suctor feeder
Eosphora	Notommatidae	littoral, periphytic benthic genus rarely or never in plankton [43]	littoral, periphytic	virgate	illoricate	no	yes	Asplanchna-type [28]	Raptorial	Macrofilter-feeders; raptors	active capture	predator	zoophages	macrophages	suctor feeder	[28, 34]
Eothinia	Notommatidae	littoral, periphytic benthic genus rarely or never in plankton [43]	littoral, periphytic	virgate	illoricate	no	yes	Notommata-type [27]	Raptorial	Macrofilter-feeders; raptors	active capture	Macrophagous omnivores/predators	zoophages	macrophages	suctor feeder	[34]
Epiphanes	Epiphanidae	planktonic or semi-planktonic [43]	planktonic or semi-planktonic	malleate	illoricate	no	yes	Euchlanis-Brachionus-type [16]	Microphagous	Microfilter-feeders; sedimentators	ciliary movement creates strong currents concentrating food	Macrophagous algivores	phytophages	macrophages	filter feeders
Erignatha	Dicranophoridae	littoral, periphytic [28]	littoral, periphytic	forcipate	illoricate	no	yes	Notommata-type [27]	Raptorial	not defined sensu Karabin	active capture		phytophages		predator	[5]
Euchlanis	Euchlanidae	littoral or periphytic; sometimes in plankton [43]	littoral or periphytic; sometimes in plankton	malleate	loricate	no	yes	Euchlanis-Brachionus-type [16]	Microphagous	Microfilter-feeders; sedimentators	ciliary movement creates strong currents concentrating food	Polyphagous rotifers	phytophages	macrophages	filter feeders	[19]
Filinia	Trochosphaeridae	planktonic or semi-planktonic [43]	planktonic or semi-planktonic	malleoramate	illoricate	yes	no	Conochilus-type [16]	Microphagous	Microfilter-feeders; sedimentators	ciliary movement creates strong currents concentrating food	Microphagous rotifers	trypto-bacteriophages	microphages	filter feeders
Floscularia	Flosculariidae	littoral, periphytic benthic genus rarely or never in plankton [43]	littoral, periphytic	malleoramate	illoricate	yes	yes	Hexarthra-type [16]	Microphagous	Microfilter-feeders; sedimentators	ciliary movement creates strong currents concentrating food		trypto-bacterio-phytophages	microphages	filter feeders	[49]
Gastropus	Gastropodidae	planktonic or semi-planktonic [43]	planktonic or semi-planktonic	virgate	loricate	no	yes	Asplanchna-type [16]	Raptorial	Macrofilter-feeders; raptors	active capture	Macrophagous algivores	phytophages	macrophages	suctor feeder	[35]
Glaciera	Dicranophoridae	benthic-periphytic, psammon [16]	littoral, periphytic	forcipate	illoricate	no	yes	Notommata-type [27]	Raptorial	not defined sensu Karabin	active capture				predator
Habrotrocha	Habrotrochidae	littoral, periphytic benthic genus rarely or never in plankton [43]	littoral, periphytic	ramate	illoricate	no	yes	Philodina-type [13, 16]	n.d.	Microfilter-feeders; sedimentators	ciliary movement creates strong currents concentrating food	Microphagous rotifers	bacterio-phytophages	microphages	filter feeders	[41]
Halolepadella	Lepadellidae	benthic-periphytic, psammon [16]	littoral, periphytic	malleate	loricate	no	yes	Euchlanis-Brachionus-type [16]	Microphagous	Microfilter-feeders; sedimentators	ciliary movement creates strong currents concentrating food				filter feeders
Harringia	Asplanchnidae	semi-planktonic [28]; benthic [35]	littoral, periphytic	incudate	illoricate	no	yes	Asplanchna-type [16]	Raptorial	macrofilter-feeders; raptors	active capture	Macrophagous omnivores/predators	zoophages	macrophages	predator	[35]
Henoceros	Philodinavidae	benthic-periphytic [16]	littoral, periphytic	ramate	illoricate	no	yes	Abrochtha-type [16, 40]	n.d.	Microfilter-feeders; sedimentators	ciliary movement creates strong currents concentrating food			microphages	filter feeders	[42]
Hexarthra	Hexarthridae	planktonic or semi-planktonic [43]	planktonic or semi-planktonic	malleoramate	illoricate	yes	yes	Hexarthra-type [16]	Microphagous	Microfilter-feeders; sedimentators	ciliary movement creates strong currents concentrating food	Microphagous rotifers	trypto-bacteriophages	microphages	filter feeders
Horaella	Trochosphaeridae	planktonic or semi-planktonic [43]	planktonic or semi-planktonic	malleoramate	illoricate	no	no	Conochilus-type [16]	Microphagous	Microfilter-feeders; sedimentators	ciliary movement creates strong currents concentrating food			microphages	filter feeders
Inflatana	Dicranophoridae	benthic-periphytic, psammon [16]	littoral, periphytic	forcipate	illoricate	no	yes	Notommata-type [27]	Raptorial	not defined sensu Karabin	active capture				predator	[5]
Itura	Ituridae	littoral, periphytic; rarely or never in plankton [28]	littoral, periphytic	forcipate	illoricate	no	yes	Notommata-type [27]	Raptorial	not defined sensu Karabin	active capture		phytophages		predator	[5, 28]
Kellicottia	Brachionidae	planktonic or semi-planktonic [28]	planktonic or semi-planktonic	malleate	loricate	yes	no	Euchlanis-Brachionus-type [16]	Microphagous	Microfilter-feeders; sedimentators	ciliary movement creates strong currents concentrating food	Polyphagous rotifers	trypto-bacteriophages	microphages	filter feeders
Keratella	Brachionidae	planktonic or semi-planktonic [43]	planktonic or semi-planktonic	malleate	loricate	yes	no	Euchlanis-Brachionus-type [16]	Microphagous	Microfilter-feeders; sedimentators	ciliary movement creates strong currents concentrating food	Polyphagous rotifers	trypto-bacterio-phytophages	microphages	filter feeders
Kostea	Dicranophoridae	benthic-periphytic, psammon [48]	littoral, periphytic	forcipate	illoricate	no	yes	Notommata-type [27]	Raptorial	not defined sensu Karabin	active capture	Macrophagous omnivores/predators	zoophages	macrophages	predator	[5]
Lacinularia	Flosculariidae	planktonic or semi-planktonic [42]	littoral, periphytic	malleoramate	illoricate	yes	yes	Hexarthra-type [16]	Microphagous	Microfilter-feeders; sedimentators	ciliary movement creates strong currents concentrating food		bacterio-phytophages	microphages	filter feeders	Wallace, pers. obs.
Lacinularoides	Flosculariidae	littoral, periphytic; rarely or never in plankton [16]	littoral, periphytic	malleoramate	illoricate	yes	yes	Hexarthra-type [16]	Microphagous	Microfilter-feeders; sedimentators	ciliary movement creates strong currents concentrating food				filter feeders
Lecane	Lecanidae	littoral or periphytic; sometimes in plankton [43]	littoral or periphytic; sometimes in plankton	malleate	loricate	no	yes	Euchlanis-Brachionus-type [16]	Microphagous	Microfilter-feeders; sedimentators	ciliary movement creates strong currents concentrating food			microphages	filter feeders	[15]
Lepadella	Lepadellidae	littoral or periphytic; sometimes in plankton [43]	littoral or periphytic; sometimes in plankton	malleate	loricate	no	yes	Euchlanis-Brachionus-type [16]	Microphagous	Microfilter-feeders; sedimentators	ciliary movement creates strong currents concentrating food			microphages	filter feeders	[38]
Limnias	Flosculariidae	littoral, periphytic benthic genus rarely or never in plankton [43]	littoral, periphytic	malleoramate	illoricate	yes	yes	Hexarthra-type [16]	Microphagous	Microfilter-feeders; sedimentators	ciliary movement creates strong currents concentrating food				filter feeders
Lindia	Lindiidae	littoral, sometimes periphytic [35]	littoral, periphytic	cardate	illoricate	no	yes	Notommata-type [19]	Raptorial	not defined sensu Karabin	active capture	Macrophagous omnivores/predators	phytophages	macrophages	suctor feeder	[35]
Lophocharis	Mytilinidae	littoral, periphytic benthic genus rarely or never in plankton [43]	littoral, periphytic	malleate	loricate	no	yes	Euchlanis-Brachionus-type [16]	Microphagous	Microfilter-feeders; sedimentators	ciliary movement creates strong currents concentrating food		trypto-bacteriophages		filter feeders
Macrochaetus	Trichotriidae	littoral, periphytic benthic genus rarely or never in plankton [43]	littoral, periphytic	malleate	loricate	yes	yes	Euchlanis-Brachionus-type [28]	Microphagous	Microfilter-feeders; sedimentators	ciliary movement creates strong currents concentrating food				filter feeders
Macrotrachela	Philodinidae	littoral, periphytic benthic genus rarely or never in plankton [43]	littoral, periphytic	ramate	illoricate	no	yes	Philodina-type [16, 40]	n.d.	Microfilter-feeders; sedimentators	ciliary movement creates strong currents concentrating food	Microphagous rotifers	trypto-bacterio	microphages	filter feeders	[41]
Microcodon	Microcodonidae	planktonic or semi-planktonic [16]	planktonic or semi-planktonic	virgate	illoricate	no	yes	Euchlanis-Brachionus-type [28]	Raptorial	Macrofilter-feeders; raptors	active capture				suctor feeder
Mikrocodides	Epiphanidae	littoral, periphytic benthic genus rarely or never in plankton [43]	littoral, periphytic	malleate	illoricate	no	yes	Euchlanis-Brachionus-type [16]	Microphagous	Microfilter-feeders; sedimentators	ciliary movement creates strong currents concentrating food	Microphagous rotifers	trypto-bacteriophages	microphages	filter feeders	[28]
Mniobia	Philodinidae	littoral, periphytic; rarely or never in plankton [16]	littoral, periphytic	ramate	illoricate	no	yes	Philodina-type [16, 40]	n.d.	Microfilter-feeders; sedimentators	ciliary movement creates strong currents concentrating food				filter feeders
Monommata	Notommatidae	littoral, periphytic benthic genus rarely or never in plankton [43]	littoral, periphytic	virgate	illoricate	no	yes	Notommata-type [27]	Raptorial	Macrofilter-feeders; raptors	active capture	Macrophagous algivores	phytophages	macrophages	suctor feeder	[34]
Myersinella	Dicranophoridae	benthic-periphytic, psammon [16]	littoral, periphytic	forcipate	illoricate	no	yes	Notommata-type [27]	Raptorial	not defined sensu Karabin	active capture				predator	[5]
Mytilina	Mytilinidae	littoral or periphytic; sometimes in plankton [43]	littoral or periphytic; sometimes in plankton	malleate	loricate	no	yes	Euchlanis-Brachionus-type [16]	Microphagous	Microfilter-feeders; sedimentators	ciliary movement creates strong currents concentrating food				filter feeders
Notholca	Brachionidae	planktonic or semi-planktonic [43]	planktonic or semi-planktonic	malleate	loricate	no	no	Euchlanis-Brachionus-type [16]	Microphagous	Microfilter-feeders; sedimentators	ciliary movement creates strong currents concentrating food	Macrophagous algivores	phytophages	macrophages	filter feeders
Notommata	Notommatidae	littoral, periphytic benthic genus rarely or never in plankton [43]	littoral, periphytic	virgate	illoricate	no	yes	Notommata-type [27]	Raptorial	Macrofilter-feeders; raptors	active capture	Macrophagous omnivores/predators	phytophages-zoophages	macrophages	suctor feeder	[34]
Octotrocha	Flosculariidae	littoral, periphytic benthic genus rarely or never in plankton [16]	littoral, periphytic	malleoramate	illoricate	yes	yes	Hexarthra-type [16]	Microphagous	Microfilter-feeders; sedimentators	ciliary movement creates strong currents concentrating food				filter feeders
Otostephanos	Habrotrochidae	limnoterrestial [16]	limnoterrestial	ramate	illoricate	no	yes	Philodina-type [13, 16]	n.d.	Microfilter-feeders; sedimentators	ciliary movement creates strong currents concentrating food	Microphagous rotifers	trypto-bacterio	microphages	filter feeders	[41]
Paracolurella	Lepadellidae	littoral, periphytic; rarely or never in plankton [16]	littoral, periphytic	malleate	loricate	no	yes	Euchlanis-Brachionus-type [16]	Microphagous	Microfilter-feeders; sedimentators	ciliary movement creates strong currents concentrating food				filter feeders
Paradicranophorus	Dicranophoridae	psammon [16]; bottom dwellers [46]	littoral, periphytic	forcipate	illoricate	no	yes	Notommata-type [27]	Raptorial	not defined sensu Karabin	active capture				predator	[5]
Paraseison	Seisonidae	sedentary on the pereiopods & carapace of Nebalia spp. [16, 29]	epibiont	fulcrate	illoricate	no	yes	Seisonid-type	Raptorial						n.d.	[29]
Parencentrum	Dicranophoridae	littoral [25]; planktonic in shallow waters [5]	littoral, periphytic	forcipate	illoricate	no	yes	Notommata-type [27]	Raptorial	not defined sensu Karabin	active capture	Macrophagous algivores	phytophages-zoophages	macrophages	predator	[5]
Pedipartia	Dicranophoridae	psammon, littoral among Spagnum [28]	littoral, periphytic	forcipate	illoricate	no	yes	Notommata-type [27]	Raptorial	not defined sensu Karabin	active capture				predator	[5]
Pentatrocha	Flosculariidae	littoral, periphytic (sessile); never in plankton [16]	littoral, periphytic	malleoramate	illoricate	yes	yes	Hexarthra-type [16, 46]	Microphagous	Microfilter-feeders; sedimentators	ciliary movement creates strong currents concentrating food				filter feeders
Philodina	Philodinidae	littoral, periphytic benthic genus rarely or never in plankton [43]	littoral, periphytic	ramate	illoricate	no	yes	Philodina-type [16, 40]	n.d.	Microfilter-feeders; sedimentators	ciliary movement creates strong currents concentrating food	Microphagous rotifers	trypto-bacterio	microphages	filter feeders	[41]
Philodinavus	Philodinavidae	littoral, periphytic; rarely or never in plankton [16]	planktonic or semi-planktonic	ramate	illoricate	no	yes	Abrochtha-type [16, 40]	n.d.	Microfilter-feeders; sedimentators	ciliary movement creates strong currents concentrating food			microphages	filter feeders	[42]
Plationus	Brachionidae	planktonic or semi-planktonic [16]	planktonic or semi-planktonic	malleate	loricate	yes	yes	Euchlanis-Brachionus-type [16]	Microphagous	Microfilter-feeders; sedimentators	ciliary movement creates strong currents concentrating food	Microphagous rotifers	phytophages	microphages	filter feeders	[44]
Platyias	Brachionidae	littoral or periphytic; sometimes in plankton [43]	littoral or periphytic; sometimes in plankton	malleate	loricate	no	yes	Euchlanis-Brachionus-type [16]	Microphagous	Microfilter-feeders; sedimentators	ciliary movement creates strong currents concentrating food	Polyphagous rotifers	trypto-bacterio-phytophages	microphages	filter feeders
Pleurata	Notommatidae	littoral, periphytic; rarely or never in plankton [15]	littoral, periphytic	virgate	illoricate	no	yes	Notommata-type [27]	Raptorial	Macrofilter-feeders; raptors	active capture				suctor feeder
Pleuretra	Philodinidae	littoral, periphytic; rarely or never in plankton [43]	littoral, periphytic	ramate	illoricate	no	yes	Philodina-type [16, 40]	n.d.	Microfilter-feeders; sedimentators	ciliary movement creates strong currents concentrating food				filter feeders	[41]
Pleurotrocha	Notommatidae	littoral, periphytic benthic genus rarely or never in plankton [43]	littoral, periphytic	virgate	illoricate	no	yes	Notommata-type [27]	Raptorial	Macrofilter-feeders; raptors	active capture				suctor feeder	[34]
Pleurotrochopsis	Notommatidae	littoral, periphytic; rarely or never in plankton [16]	littoral, periphytic	virgate	illoricate	no	yes	Notommata-type [27]	Raptorial	Macrofilter-feeders; raptors	active capture				suctor feeder	[34]
Ploesoma	Synchaetidae	planktonic or semi-planktonic [43]	planktonic or semi-planktonic	virgate	loricate	no	yes	Asplanchna-type [16]	Raptorial	Macrofilter-feeders; raptors	active capture	Macrophagous omnivores/predators	zoophages	macrophages	suctor feeder
Polyarthra	Synchaetidae	planktonic or semi-planktonic [43]	planktonic or semi-planktonic	virgate	illoricate	yes	no	Asplanchna-type [16]	Raptorial	Macrofilter-feeders; raptors	active capture	Macrophagous algivores	phytophages	macrophages	suctor feeder
Pompholyx	Testudinellidae	planktonic or semi-planktonic [43]	planktonic or semi-planktonic	malleoramate	loricate	no	no	Hexarthra-type [16]	Microphagous	Microfilter-feeders; sedimentators	ciliary movement creates strong currents concentrating food	Microphagous rotifers	trypto-bacteriophages	microphages	filter feeders
Pourriotia	Notommatidae	endoparasite [15]	endobiont	virgate	illoricate	no	yes	Notommata-type [27]	Raptorial	Macrofilter-feeders; raptors	active capture	parasite; not defined	parasite; not defined	parasite; not defined	suctor feeder
Proales	Proalidae	planktonic, epiphytic, epizoic, or parasitic [4]	planktonic or semi-planktonic	malleate	illoricate	no	yes	Notommata-type [15, 27]	Microphagous	Microfilter-feeders; sedimentators	ciliary movement creates strong currents concentrating food				filter feeders	[4]
Proalides	Epiphanidae	littoral, periphytic benthic genus never in plankton [43]	littoral, periphytic	malleate	illoricate	no	yes	Euchlanis-Brachionus-type [16]	Microphagous	Microfilter-feeders; sedimentators	ciliary movement creates strong currents concentrating food			macrophages	filter feeders
Proalinopsis	Proalidae	littoral, periphytic; rarely or never in plankton [28]	littoral, periphytic	virgate	illoricate	no	yes	Notommata-type [15, 27]	Raptorial	Macrofilter-feeders; raptors	active capture	Macrophagous algivores	phytophages	macrophages	suctor feeder	[4]
Pseudoeuchlanis	Euchlanidae	littoral [11]	littoral, periphytic	malleate	illoricate	no	yes	Euchlanis-Brachionus-type [16]	Microphagous	Microfilter-feeders; sedimentators	ciliary movement creates strong currents concentrating food				filter feeders
Pseudoharringia	Notommatidae	benthic-periphytic or semi-planktonic in littoral [16]	littoral or periphytic; sometimes in plankton	virgate	illoricate	no	yes	Notommata-type [27]	Raptorial	Macrofilter-feeders; raptors	active capture				suctor feeder
Pseudoploesoma	Notommatidae	littoral or periphytic; sometimes in plankton [43]	littoral or periphytic; sometimes in plankton	virgate	loricate	no	yes	Notommata-type [27]	Raptorial	Macrofilter-feeders; raptors	active capture				suctor feeder
Ptygura	Flosculariidae	littoral, periphytic benthic genus rarely or never in plankton [43]	littoral, periphytic	malleoramate	illoricate	no	no	Hexarthra-type [16]	Microphagous	Microfilter-feeders; sedimentators	ciliary movement creates strong currents concentrating food	Microphagous rotifers	trypto-bacteriophages	microphages	filter feeders	[49]
Pulchritia	Trichotriidae	running water in river [29]	planktonic or semi-planktonic	malleate	loricate	yes	yes	Euchlanis-Brachionus-type [30]	Microphagous	Microfilter-feeders; sedimentators	ciliary movement creates strong currents concentrating food				filter feeders
Resticula	Notommatidae	littoral, periphytic; rarely or never in plankton [16]	littoral, periphytic	virgate	illoricate	no	yes	Notommata-type [27]	Raptorial	Macrofilter-feeders; raptors	active capture	Macrophagous omnivores/predators	zoophages	macrophages	suctor feeder	[5]
Rhinoglena	Epiphanidae	planktonic or semi-planktonic [28]	planktonic or semi-planktonic	malleate	illoricate	no	yes	Euchlanis-Brachionus-type [16]	Microphagous	Microfilter-feeders; sedimentators	ciliary movement creates strong currents concentrating food	Macrophagous algivores	phytophages		filter feeders
Rotaria	Philodinidae	planktonic or semi-planktonic [43]	planktonic or semi-planktonic	ramate	illoricate	no	yes	Philodina-type [16, 40]	n.d.	Microfilter-feeders; sedimentators	ciliary movement creates strong currents concentrating food	Microphagous rotifers	trypto-bacterio-phytophages	microphages	filter feeders	[41]
Rousseletia	Notommatidae	littoral; planktonic in shallow ponds [26]	littoral, periphytic	virgate	illoricate	no	yes	Notommata-type [27]	Raptorial	Macrofilter-feeders; raptors	active capture				suctor feeder
Scaridium	Scaridiidae	littoral or periphytic; sometimes in plankton [28]	littoral or periphytic; sometimes in plankton	virgate	loricate	no	yes	Notommata-type [27, 28]	Raptorial	Macrofilter-feeders; raptors	active capture			macrophages	suctor feeder
Scepanotrocha	Habrotrochidae	limnoterrestial [16]	limnoterrestial	ramate	illoricate	no	yes	Philodina-type [13, 16]	n.d.	Microfilter-feeders; sedimentators	ciliary movement creates strong currents concentrating food				filter feeders
Seison	Seisonidae	sedentary on the pleopods of Nebalia spp. [16]	epibiont	fulcrate	illoricate	no	yes	Seisonid-type	Microphagous						n.d.
Sinantherina	Flosculariidae	littoral or periphytic [48]	littoral, periphytic	malleoramate	illoricate	yes	yes	Hexarthra-type [16]	Microphagous	Microfilter-feeders; sedimentators	ciliary movement creates strong currents concentrating food				filter feeders
Sphyrias	Notommatidae	littoral or periphytic; sometimes in plankton [28]	littoral or periphytic; sometimes in plankton	virgate	illoricate	no	yes	Notommata-type [27]	Raptorial	Macrofilter-feeders; raptors	active capture	Macrophagous omnivores/predators	zoophages		suctor feeder	[5]
Squatinella	Lepadellidae	littoral, periphytic benthic genus rarely or never in plankton [43]	littoral, periphytic	malleate	loricate	yes	yes	Euchlanis-Brachionus-type [16]	Microphagous	Microfilter-feeders; sedimentators	ciliary movement creates strong currents concentrating food		phytophages	microphages	filter feeders	[43]
Stephanoceros	Collothecidae	littoral, periphytic benthic genus never in plankton [43]	littoral, periphytic	uncinate	illoricate	yes	yes	Collotheca-type [16]	Raptorial	Microfilter-feeders; sedimentators	infundibulum for enclosing & ingesting food	Macrophagous algivores	phytophages	macrophages	suctor feeder
Streptognatha	Dicranophoridae	soft & acid water ponds [5]	littoral, periphytic	forcipate	illoricate	no	yes	Notommata-type [27]	Raptorial	not defined sensu Karabin	active capture				predator
Synchaeta	Synchaetidae	planktonic or semi-planktonic [43]	planktonic or semi-planktonic	virgate	illoricate	no	yes	Asplanchna-type [16]	Raptorial	Macrofilter-feeders; raptors	active capture	Macrophagous algivores	phytophages	macrophages	suctor feeder
Taphrocampa	Notommatidae	littoral, periphytic benthic genus rarely or never in plankton [43]; littoral & periphytic [34]	littoral, periphytic	virgate	illoricate	no	yes	Notommata-type [27]	Raptorial	Macrofilter-feeders; raptors	active capture				suctor feeder
Testudinella	Testudinellidae	littoral or periphytic; sometimes in plankton [43]	littoral or periphytic; sometimes in plankton	malleoramate	illoricate	no	yes	Hexarthra-type [16]	Microphagous	Microfilter-feeders; sedimentators	ciliary movement creates strong currents concentrating food			microphages	filter feeders
Tetrasiphon	Tetrasiphonidae	littoral or periphytic; sometimes in plankton [16]	littoral or periphytic; sometimes in plankton	virgate	illoricate	no	yes	Notommata-type [27]	Raptorial	Macrofilter-feeders; raptors	active capture				suctor feeder
Trichocerca	Trichocercidae	planktonic or semi-planktonic [43]	planktonic or semi-planktonic	virgate	loricate	no	yes	Asplanchna-type [16]	Raptorial	Macrofilter-feeders; raptors	active capture	Macrophagous omnivores/predators	phytophages	macrophages	suctor feeder
Trichotria	Trichotriidae	littoral or periphytic; sometimes in plankton [43]	littoral or periphytic; sometimes in plankton	malleate	loricate	yes	yes	Euchlanis-Brachionus-type [28]	Microphagous	Microfilter-feeders; sedimentators	ciliary movement creates strong currents concentrating food	Microphagous rotifers	trypto-bacteriophages	microphages	filter feeders
Tripleuchlanis	Euchlanidae	littoral, periphytic benthic genus rarely or never in plankton [43]	littoral, periphytic	malleate	loricate	no	yes	Euchlanis-Brachionus-type [16]	Microphagous	Microfilter-feeders; sedimentators	ciliary movement creates strong currents concentrating food				filter feeders
Trochosphaera	Trochosphaeridae	planktonic [28]	planktonic or semi-planktonic	malleoramate	illoricate	no	no	Conochilus-type [16]	Microphagous	Microfilter-feeders; sedimentators	ciliary movement creates strong currents concentrating food				filter feeders
Tylotrocha	Notommatidae	shallow ponds [21]	planktonic or semi-planktonic	virgate	illoricate	yes	yes	Notommata-type [27]	Raptorial	Macrofilter-feeders; raptors	active capture				suctor feeder
Wierzejskiella	Dicranophoridae	littoral psammon or periphytic; terrestial wet mosses [5]	limnoterrestial	forcipate	loricate	no	yes	Notommata-type [27]	Raptorial	not defined sensu Karabin	active capture				predator	[5]
Wigrella	Dicranophoridae	littoral and hyporheic psammon [5]	littoral, periphytic	forcipate	illoricate	no	yes	Notommata-type [27]	Raptorial	not defined sensu Karabin	active capture				predator	[5]
Wolga	Trichotriidae	littoral, periphytic benthic genus rarely or never in plankton [43]	littoral, periphytic	malleate	loricate	yes	yes	Euchlanis-Brachionus-type [16]	Microphagous	Microfilter-feeders; sedimentators	ciliary movement creates strong currents concentrating food				filter feeders
Wulfertia	Proalidae	littoral or periphytic; sometimes in plankton [16]	littoral or periphytic; sometimes in plankton	malleate	illoricate	no	yes	Notommata-type [15, 27]	Microphagous	Microfilter-feeders; sedimentators	ciliary movement creates strong currents concentrating food				filter feeders
Zelinkiella	Philodinidae	marine, epibiont [16]	epibiont	ramate	illoricate	no	no	Philodina-type [16, 40]	n.d.	Microfilter-feeders; sedimentators	ciliary movement creates strong currents concentrating food	parasite; not defined	parasite; not defined	parasite; not defined	filter feeders
	Sources
*	Corona defined by possessing cilia used in swimming &/or food capture; not as an infundibulum [20]
1	Berzins, B. (1973): Some rotifers from Cambodia. Hydrobiologia 41(4): 453-459. https://doi.org/10.1007/BF00016466
2	Bevington, D.J., White, C. & Wallace, R.L. (1993): Predatory behavior of Cupelopagis vorax (Rotifera; Collothecacea; Atrochidae) on protozoan prey. Hydrobiologia 313, 213-217. https://doi.org/10.1007/BF00025953
3	Castro, J., Castro, G., Castro, A.E. & Ramírez, J. (2018): Laboratory controlled production of Lepadella sp. (Bory of St. Vincent, 1826), using three different microalgae and their combination, enriched with yeast. International Journal of Fisheries and Aquatic Studies 6(5): 372-376.
4	De Smet, W.H. (1996): Rotifera. Volume 4: The Proalidae (Monogononta). Guides to the Identification of the Microinvertebrates of the Continental Waters of the World, No. 9. SPB Academic Publishing, Amsterdam.
5	De Smet, W.H. (1997): Rotifera. Volume 5: The Dicranophoridae (Monogononta) and: The Ituridae (Monogononta) (GUIDES # 12); Harring, H.K. & Myers, F.J. (1928): The rotifera fauna of Wisconsin. IV. The Dicranophorinae. Transactions of the Wisconsin Academy of SAciences, Arts and Letters 23: 667-808. (pg. 749).
6	De Smet, W.H. (2003): Paradicranophorus sinus sp. nov. (Dicranophoridae, Monogononta) a new rotifer from Belgium, with remarks on some other species of the genus Paradicranophorus Wiszniewski, 1929 and description of Donneria gen. nov.. Belgian Journal of Zoology, vol. 133(2): 181-188.
7	De Smet, W.H. (2006): Asciaporrectidae, a new family of Rotifera (Monogononta: Ploima) with description of Asciaporrecta arcellicola gen. et sp. nov. and A. difflugicola gen. et sp. nov. inhabiting shells of testate amoebae (Protozoa). Zootaxa 1339: 31-49. [Habitat]
8	De Smet, W.H. (2007): Cotylegaleatidae, a new family of Ploima (Rotifera: Monogononta), for Cotylegaleata perplexa gen. et sp. nov., from freshwater benthos of Belgium. Zootaxa 1425: pgs 35-43
9	De Smet, W.H. (2015): Rotifera from the Mediterranean Sea, with description of ten new species. Zootaxa 4028: 151-196.
10	De Smet W.H. & Bozkurt A. (2016): Cotylegaleata iskenderunensis n. sp., the second known species of the rotifer family Cotylegaleatidae (Monogononta: Ploima). Zootaxa. 2016 Nov 15;4193(1):zootaxa.4193.1.9. https://doi.org/ 10.11646/zootaxa.4193.1.9. PMID: 27988709.
11	Dhanapathi, M.V.S.S.S. (1978): New species of rotifer from India belonging to the family Brachionidae. Zoological Journal of the Linnean Society 62(3): 305-308.
12	Donner J. (1965): Ordnung Bdelloidea (Rotatoria, Rädertiere). Akademie-Verlag. Berlin.
13	Edmondson, W.T. (1959): Rotifera In Freshwater Biology, 2nd ed. John Wiley & Sons, Inc. Pg.484 Habrotrochidae-type - corona of small trochi, gut a syncytial mass of food vacuoles.
14	Espinosa‐Rodríguez, C.A., Sarma, S.S.S., Nandini, S., Wallacer, R.L. (2021): Substratum selection and feeding responses influence the demography of the sessile rotifer Cupelopagis vorax (Collothecacea: Atrochidae). International Review of Hydrobiology 106: 18-28. https://doi.org/10.1002/iroh.202002051.
15	Flesch, F., Berger, P., Robles-Vargas, D., Santos-Medrano, G.E. & Rico-Martínez R. (2019): Characterization and determination of the toxicological risk of Biochar using invertebrate toxicity tests in the State of Aguascalientes, México. Applied Sciences 9(8):1706. https://doi.org/10.3390/app9081706
16	Fontaneto, D. & De Smet, W. H. (2015): 4. Rotifera. Volume 3 Gastrotricha and Gnathifera, edited by Andreas Schmidt-Rhaesa, Berlin, München, Boston: De Gruyter. pp. 217-300. https://doi.org/10.1515/9783110274271.217
17	Ganf, G.G., Shiel, R.J. & Merrick, C.J. (1983): Parasitism: the possible cause of the collapse of a Volvox population in Mount Bold Reservoir, South Australia. Australian Journal of Marine and Freshwater Research 34: 489-494; Wallace, pers. obs.
18	Gilbert, J.J. (1976): Selective cannibalism in the rotifer Asplanchna sieboldii: Contact recognition of morphotype and clone. PNAS 73(9): 3233-3237. https://doi.org/10.1073/pnas.73.9.3233; Edmondson (1959): Freshwater Biology, 2nd ed. John Wiley & Sons, Inc. (see p 482)
19	Gulati, R.D., Ejsmont-Karabin, J., Rooth, J. & Siewertsen, K. (1987): A laboratory study of feeding and assimilation in Euchlanis dilatata lucksiana. Hydrobiologia 186/187: 346-354. https://doi.org/10.1007/BF00048931; King (1967): Food, age, and the dynamics of a laboratory population of rotifers. Ecology 48(1): 111-128. https://doi.org/10.2307/1933423.
20	Harring, H.K. & Myers F.J. (1922): The rotifer fauna of Wisconsin. Transactions of the Wisconsin Academy of Sciences, Arts and Letters 20: 553-662. (Habitat: pg. 610)
21	Harring, H.K. & Myers, F.J. (1924):The rotifer fauna of Wisconsin II—A revision of the notommatid rotifers exclusive of Dicranophorinae. Transactions of the Wisconsin Academy of Sciences, Arts and Letters 21: 415-549.
22	Hochberg, R., O'Brien, S. & Puleo, A. (2010): Behavior, metamorphosis, and muscular organization of the predatory rotifer Acyclus inquietus (Rotifera, Monogononta). Invertebrate Biology 129: 210-219. https://doi.org/10.1111/j.1744-7410.2010.00202.x.
23	Hochberg, R, Yang, H., Hochberg, A., Walsh, E.J. & Wallace, R.L. (2019): When heads are not homologous: the coronae of larval and adult collothecid rotifers (Rotifera: Monogononta: Collothecaceae). Hydrobiologia 844: 191-207. https://dor.org/10.1007/s10750-018-3760-3​[Atrochidae & Collothecidae corona absent in the adult; Corona replaced by an infundibulum.]
24	Jennings, H.S. (1894): A list of the Rotatoria of the Great Lakes and of some of the inland lakes of Michigan. Bulletin of the Michigan Fish Commisson 3: 1-34, plates 1 &2
25	Jersabek, C.D. (1994): Encentrum (Parencentrum) walterkostei n. sp., a new dicranophorid rotifer (Rotatoria: Monogononta) from the high alpine zone of the Central Alps (Austria). Hydrobiologia 281: 51-66. https://doi.org/10.1007/BF00006555
26	Koste, W. & Shiel, R.J. (1991): Rotifera from Australian inland waters. VII. Notommatidae (Rotifera: Monogononta). Transactions of the Royal Society of South Australia 115: 111-159; HarringH.K. (1913): A list of the Rotatoria of Washington and vicinity, with descroptions of a new genus and ten new species. Proceedings of the United States National Nuseum 46: 387-405.
27	Koste, W. & Shiel, R.J. (1987): Rotifera from Australian Inland Waters. II. Epiphanidae and Brachionidae (Rotifera: Monogononta). Invertebrate Taxonomy 7: 949-1021.
28	Koste, W. (1978): Rotatoria Die Rädertiere Mitteleuropas. Gebrüder Borntraeger, Stuttgart.
29	Leasi, F., Neves, R.C., Worsaae, K. & Sørensen, M.V. (2012): Musculature of Seison nebaliae Grube, 1861 and Paraseison annulatus (Claus, 1876) revealed with CLSM: a comparative study of the gnathiferan key taxon Seisonacea (Rotifera). Zoomorphology 131: 185-195. https://doi.org/10.1007/s00435-012-0155-2.
30	Luo, Y. & Segers, H. (2013): On Pulchritia new genus, with a reappraisal of the genera of Trichotriidae (Rotifera, Monogononta). Zookeys 342: 1-12. https://doi.org/10.3897/zookeys.342.5948.
31	Madhu, K., Madhu, R., Mohandas, M.P. & Vijayan, M.T. (2016): Isolation, identification and culture of the marine rotifer Colurella adriatica Ehrenberg, 1831 (Family: Lepadellidae) from Andaman & Nicobar Islands: A promising live feed for larval rearing of high value shellfishes and finfishes. Journal of the Marine Biological Association of India, 58 (1): 5-12. https://doi.org/10.6024/jmbai.2016.5…
32	Nandini, S. & Sarma, S.S.S. (2005): Life history characteristics of Asplanchnopus multiceps (Rotifera) fed rotifer and cladoceran Prey. Hydrobiologia 546: 491-501; Nogardy, T. & Segers, H. (2002): Rotifera. Volume 6: Asplanchnida. Guides to the Identification of the Microinvertebrates of the Continental Waters of the World, No. 18. Backhuys Publishers.
33	Nandini, S. & Sarma, S.S.S. (2021): Population growth, demography and competition studies on Dipleuchlanis propatula (Gosse, 1886) (Rotifera: Euchlanidae). Aquatic Ecology 55(4): 1305-1316. https://doi.org/0.1007/s10452-021-09883-0.
34	Nogrady, T. & Pourriot , R.(1995): Rotifera. Volume 3: The Notommatidae and: The Scaridiidae. Guides to the Identification of the Microinvertebrates of the Continental Waters of the World, No. 8. SPB Academic Publishers.
35	Nogrady, T. & Segers, H. (2002): Rotifera. Volume 6: Asplanchnidae, Gastropodidae, Lindiidae, Microcodidae, Synchaetidae, Trochosphaeridae and Filinia. Guides to the Identification of the Microinvertebrates of the Continental Waters of the World, No. 18. SPB Academic Publishers.
36	Ooms-Wilms, A.L. (1997): Are bacteria an important food source for rotifers in eutrophic lakes?. Journal of Plankton Research, 19(8): 1125-1141. https://doi.org/10.1093/plankt/19.8.1125
37	Örstan, A. (2021): An extraordinary new fluvial bdelloid rotifer, Coronistomus impossibilis gen. nov., sp. nov., with adaptations for turbulent flow (Rotifera: Bdelloidea: Coronistomidae fam. nov.). Zootaxa 4966: 16-28. See video clip = https://youtu.be/oFXUKAAGYao
38	Pejler, B. & Berzins, B. (1993): On the ecology of Cephalodella. Hydrobiologia 259: 125-128, 1993. https://doi.org/10.1007/BF00008378
39	Pourriot, R. (1965): Rechérches sur l'ecologie des Rotiféres. Vie et Milieu (Supplement) 21: 1-224.
40	Ricci, C. & Melone, G. (2000): Key to the identification of the genera of bdelloid rotifers. Hydrobiologia 418: 73-80. https://doi.org10.1023/A:1003840216827.
41	Ricci, C. (1984): Culturing of some bdelloid rotifers. Hydrobiologia 112: 45–51. https://doi.org/10.1007/BF00007665
42	Ricci, C., Melone, G. (1998): The Philodinavidae (Rotifera Bdelloidea): a special family. Hydrobiologia 385: 77-85. https://doi.org/10.1023/A:1003458611180
43	Sharma S.S.S. (2001): Zooplankton diversity: Freshwater planktonic and semi-planktonic Rotifera. Water Quality Assessment, Biomonitoring and Zooplankton diversity 2001: 190-215.
44	Sarma, S.S.S., Lara Resendiz, R.A.R.A., & Nandini, S. (2011): Morphometric and demographic responses of brachionid prey (Brachionus calyciflorus Pallas and Plationus macracanthus (Daday) in the presence of different densities of the predator Asplanchna brightwellii (Rotifera: Asplanchnidae. Hydrobiologia 662: 179-187. https://doi.org/10.1007/s10750-010-0494-2.
45	Schöll, K. & Dózsa-Farkas, K. (2006): A new record of an interesting parasitic rotifer Balatro calvus. CLAPARÉDE, 1867 in Hungary. Opuscula Zoologica 35: 85-87.
46	Segers, H. & Shiel, R.J. (2008): Diversity of cryptic Metazoa in Australian freshwaters: a new genus and two new species of sessile rotifer (Rotifera, Monogononta, Gnesiotrocha, Flosculariidae. Zootaxa 1750: 19-31
47	Van Damme, K. & Segers, H. (2004): Anomopus telphusae Piovanelli, 1903, an epizoic bdelloid (Rotifera: Bdelloidea) on the Socotran endemic crab Socotrapotamon socotrensis (Hilgendorf, 1883). Fauna of Saudi Arabia 20: 169-175.
48	Wallace, R.L. (1987): Coloniality in the phylum Rotifera. Hydrobiologia 147: 141-155. https://doi.org10.1007/978-94-009-4059-8_20
49	Wallace, R.L. & Starkweather, P.L. (1985): Clearance rates of sessile rotifers: in vitro determinations. Hydrobiologia 121: 139-144. https://doi.org/10.1007/BF00008716.

## Sheet: Supplementary Table S3
genus	Family	habitat	trophi	lorica	defence	foot	corona	cluster number
Abrochtha	Philodinavidae	littoral, periphytic	ramate	illoricate	defence no	foot yes	Abrochtha-type	1
Acyclus	Atrochidae	epibiont	uncinate	illoricate	defence yes	foot yes	absent in adult state	2
Adineta	Adinetidae	littoral, periphytic	ramate	illoricate	defence no	foot yes	Adineta-type	1
Allodicranophorus	Dicranophoridae	littoral, periphytic	forcipate	illoricate	defence no	foot yes	Notommata-type	3
Albertia	Dicranophoridae	endobiont	forcipate	illoricate	defence no	foot yes	Notommata-type	4
Anchistestudinella	Testudinellidae	littoral, periphytic	malleoramate	illoricate	defence no	foot yes	Hexarthra-type	5
Anomopus	Philodinidae	epibiont	ramate	illoricate	defence no	foot yes	Philodina-type	1
Anuraeopsis	Brachionidae	planktonic or semi-planktonic	malleate	loricate	defence no	foot no	Euchlanis-Brachionus-type	6
Asciaporrecta	Asciaporrectidae	endobiont	forcipate	illoricate	defence no	foot yes	Notommata-type	4
Ascomorpha	Gastropodidae	planktonic or semi-planktonic	virgate	loricate	defence no	foot no	Asplanchna-type	7
Ascomorphella	Trichocercidae	endobiont	virgate	illoricate	defence no	foot yes	Asplanchna-type	4
Aspelta	Dicranophoridae	littoral, periphytic	forcipate	illoricate	defence no	foot yes	Notommata-type	3
Asplanchna	Asplanchnidae	planktonic or semi-planktonic	incudate	illoricate	defence no	foot no	Asplanchna-type	8
Asplanchnopus	Asplanchnidae	littoral, periphytic	incudate	illoricate	defence no	foot yes	Asplanchna-type	3
Atrochus	Atrochidae	littoral, periphytic	uncinate	illoricate	defence no	foot yes	absent in adult state	3
Balatro	Dicranophoridae	endobiont	forcipate	illoricate	defence no	foot yes	absent in adult state	4
Beauchampia	Flosculariidae	littoral, periphytic	malleoramate	illoricate	defence no	foot yes	Hexarthra-type	5
Beauchampiella	Euchlanidae	littoral, periphytic	malleate	illoricate	defence no	foot yes	Euchlanis-Brachionus-type	6
Birgea	Birgeidae	littoral, periphytic	virgate	illoricate	defence no	foot yes	Notommata-type	3
Brachionus	Brachionidae	planktonic or semi-planktonic	malleate	loricate	defence yes	foot no	Euchlanis-Brachionus-type	6
Bradyscela	Adinetidae	littoral, periphytic	ramate	illoricate	defence no	foot yes	Adineta-type	1
Bryceella	Proalidae	littoral, periphytic	malleate	loricate	defence no	foot yes	Notommata-type	6
Cephalodella	Notommatidae	planktonic or semi-planktonic	virgate	illoricate	defence no	foot no	Notommata-type	9
Ceratotrocha	Philodinidae	littoral, periphytic	ramate	illoricate	defence yes	foot yes	Philodina-type	2
Claria	Clariaidae	endobiont	virgate	illoricate	defence no	foot yes	absent in adult state	4
Collotheca	Collothecidae	littoral, periphytic	uncinate	illoricate	defence yes	foot yes	Collotheca-type	2
Colurella	Lepadellidae	littoral, periphytic	malleate	loricate	defence no	foot yes	Euchlanis-Brachionus-type	6
Conochilopsis	Conochilidae	planktonic or semi-planktonic	malleoramate	illoricate	defence yes	foot yes	Conochilus-type	10
Conochilus	Conochilidae	planktonic or semi-planktonic	malleoramate	illoricate	defence yes	foot yes	Conochilus-type	10
Coronistomus	Coronistomidae	littoral, periphytic	ramate	illoricate	defence no	foot yes	Abrochtha-type	1
Cotylegaleata	Cotylegaleatidae	littoral, periphytic	virgate	loricate	defence no	foot yes	Notommata-type	3
Cupelopagis	Atrochidae	littoral, periphytic	uncinate	illoricate	defence no	foot yes	absent in adult state	3
Cyrtonia	Epiphanidae	littoral, periphytic	malleate	illoricate	defence no	foot yes	Euchlanis-Brachionus-type	6
Dicranophoroides	Dicranophoridae	littoral, periphytic	forcipate	illoricate	defence no	foot yes	Notommata-type	3
Dicranophorus	Dicranophoridae	planktonic or semi-planktonic	forcipate	illoricate	defence no	foot yes	Notommata-type	3
Didymodactylus	Philodinidae	littoral, periphytic	ramate	illoricate	defence no	foot yes	Philodina-type	1
Dipleuchlanis	Euchlanidae	littoral, periphytic	malleate	loricate	defence no	foot yes	Euchlanis-Brachionus-type	6
Diplois	Euchlanidae	littoral, periphytic	malleate	loricate	defence no	foot yes	Euchlanis-Brachionus-type	6
Dissotrocha	Philodinidae	littoral, periphytic	ramate	illoricate	defence no	foot yes	Philodina-type	1
Donneria	Dicranophoridae	littoral, periphytic	forcipate	illoricate	defence yes	foot yes	Notommata-type	3
Dorria	Dicranophoridae	littoral, periphytic	virgate	illoricate	defence no	foot yes	Notommata-type	3
Dorystoma	Notommatidae	littoral, periphytic	virgate	illoricate	defence no	foot yes	Notommata-type	3
Drilophaga	Notommatidae	endobiont	virgate	illoricate	defence no	foot yes	Notommata-type	4
Elosa	Trichocercidae	littoral, periphytic	virgate	loricate	defence no	foot no	Asplanchna-type	7
Embata	Philodinidae	littoral, periphytic	ramate	illoricate	defence no	foot yes	Philodina-type	1
Encentrum	Dicranophoridae	littoral, periphytic	forcipate	illoricate	defence no	foot yes	Notommata-type	3
Enteroplea	Notommatidae	littoral, periphytic	virgate	illoricate	defence no	foot yes	Notommata-type	3
Eosphora	Notommatidae	littoral, periphytic	virgate	illoricate	defence no	foot yes	Asplanchna-type	3
Eothinia	Notommatidae	littoral, periphytic	virgate	illoricate	defence no	foot yes	Notommata-type	3
Epiphanes	Epiphanidae	planktonic or semi-planktonic	malleate	illoricate	defence no	foot yes	Euchlanis-Brachionus-type	6
Erignatha	Dicranophoridae	littoral, periphytic	forcipate	illoricate	defence no	foot yes	Notommata-type	3
Euchlanis	Euchlanidae	littoral, periphytic	malleate	loricate	defence no	foot yes	Euchlanis-Brachionus-type	6
Filinia	Trochosphaeridae	planktonic or semi-planktonic	malleoramate	illoricate	defence yes	foot no	Conochilus-type	10
Floscularia	Flosculariidae	littoral, periphytic	malleoramate	illoricate	defence yes	foot yes	Hexarthra-type	5
Gastropus	Gastropodidae	planktonic or semi-planktonic	virgate	loricate	defence no	foot yes	Asplanchna-type	7
Glaciera	Dicranophoridae	littoral, periphytic	forcipate	illoricate	defence no	foot yes	Notommata-type	3
Habrotrocha	Habrotrochidae	littoral, periphytic	ramate	illoricate	defence no	foot yes	Philodina-type	1
Halolepadella	Lepadellidae	littoral, periphytic	malleate	loricate	defence no	foot yes	Euchlanis-Brachionus-type	6
Harringia	Asplanchnidae	littoral, periphytic	incudate	illoricate	defence no	foot yes	Asplanchna-type	3
Henoceros	Philodinavidae	littoral, periphytic	ramate	illoricate	defence no	foot yes	Abrochtha-type	1
Hexarthra	Hexarthridae	planktonic or semi-planktonic	malleoramate	illoricate	defence yes	foot yes	Hexarthra-type	10
Horaella	Trochosphaeridae	planktonic or semi-planktonic	malleoramate	illoricate	defence no	foot no	Conochilus-type	10
Inflatana	Dicranophoridae	littoral, periphytic	forcipate	illoricate	defence no	foot yes	Notommata-type	3
Itura	Ituridae	littoral, periphytic	forcipate	illoricate	defence no	foot yes	Notommata-type	3
Kellicottia	Brachionidae	planktonic or semi-planktonic	malleate	loricate	defence yes	foot no	Euchlanis-Brachionus-type	6
Keratella	Brachionidae	planktonic or semi-planktonic	malleate	loricate	defence yes	foot no	Euchlanis-Brachionus-type	6
Kostea	Dicranophoridae	littoral, periphytic	forcipate	illoricate	defence no	foot yes	Notommata-type	3
Lacinularia	Flosculariidae	littoral, periphytic	malleoramate	illoricate	defence yes	foot yes	Hexarthra-type	5
Lacinularoides	Flosculariidae	littoral, periphytic	malleoramate	illoricate	defence yes	foot yes	Hexarthra-type	5
Lecane	Lecanidae	littoral, periphytic	malleate	loricate	defence no	foot yes	Euchlanis-Brachionus-type	6
Lepadella	Lepadellidae	littoral, periphytic	malleate	loricate	defence no	foot yes	Euchlanis-Brachionus-type	6
Limnias	Flosculariidae	littoral, periphytic	malleoramate	illoricate	defence yes	foot yes	Hexarthra-type	5
Lindia	Lindiidae	littoral, periphytic	cardate	illoricate	defence no	foot yes	Notommata-type	3
Lophocharis	Mytilinidae	littoral, periphytic	malleate	loricate	defence no	foot yes	Euchlanis-Brachionus-type	6
Macrochaetus	Trichotriidae	littoral, periphytic	malleate	loricate	defence yes	foot yes	Euchlanis-Brachionus-type	6
Macrotrachela	Philodinidae	littoral, periphytic	ramate	illoricate	defence no	foot yes	Philodina-type	1
Microcodon	Microcodonidae	planktonic or semi-planktonic	virgate	illoricate	defence no	foot yes	Euchlanis-Brachionus-type	9
Mikrocodides	Epiphanidae	littoral, periphytic	malleate	illoricate	defence no	foot yes	Euchlanis-Brachionus-type	6
Mniobia	Philodinidae	littoral, periphytic	ramate	illoricate	defence no	foot yes	Philodina-type	1
Monommata	Notommatidae	littoral, periphytic	virgate	illoricate	defence no	foot yes	Notommata-type	3
Myersinella	Dicranophoridae	littoral, periphytic	forcipate	illoricate	defence no	foot yes	Notommata-type	3
Mytilina	Mytilinidae	littoral, periphytic	malleate	loricate	defence no	foot yes	Euchlanis-Brachionus-type	6
Notholca	Brachionidae	planktonic or semi-planktonic	malleate	loricate	defence no	foot no	Euchlanis-Brachionus-type	6
Notommata	Notommatidae	littoral, periphytic	virgate	illoricate	defence no	foot yes	Notommata-type	3
Octotrocha	Flosculariidae	littoral, periphytic	malleoramate	illoricate	defence yes	foot yes	Hexarthra-type	5
Otostephanos	Habrotrochidae	littoral, periphytic	ramate	illoricate	defence no	foot yes	Philodina-type	1
Paracolurella	Lepadellidae	littoral, periphytic	malleate	loricate	defence no	foot yes	Euchlanis-Brachionus-type	6
Paradicranophorus	Dicranophoridae	littoral, periphytic	forcipate	illoricate	defence no	foot yes	Notommata-type	3
Paraseison	Seisonidae	epibiont	fulcrate	illoricate	defence no	foot yes	Seisonid-type	1
Parencentrum	Dicranophoridae	littoral, periphytic	forcipate	illoricate	defence no	foot yes	Notommata-type	3
Pedipartia	Dicranophoridae	littoral, periphytic	forcipate	illoricate	defence no	foot yes	Notommata-type	3
Pentatrocha	Flosculariidae	littoral, periphytic	malleoramate	illoricate	defence yes	foot yes	Hexarthra-type	5
Philodina	Philodinidae	littoral, periphytic	ramate	illoricate	defence no	foot yes	Philodina-type	1
Philodinavus	Philodinavidae	planktonic or semi-planktonic	ramate	illoricate	defence no	foot yes	Abrochtha-type	1
Plationus	Brachionidae	planktonic or semi-planktonic	malleate	loricate	defence yes	foot yes	Euchlanis-Brachionus-type	6
Platyias	Brachionidae	littoral, periphytic	malleate	loricate	defence no	foot yes	Euchlanis-Brachionus-type	6
Pleurata	Notommatidae	littoral, periphytic	virgate	illoricate	defence no	foot yes	Notommata-type	3
Pleuretra	Philodinidae	littoral, periphytic	ramate	illoricate	defence no	foot yes	Philodina-type	1
Pleurotrocha	Notommatidae	littoral, periphytic	virgate	illoricate	defence no	foot yes	Notommata-type	3
Pleurotrochopsis	Notommatidae	littoral, periphytic	virgate	illoricate	defence no	foot yes	Notommata-type	3
Ploesoma	Synchaetidae	planktonic or semi-planktonic	virgate	loricate	defence no	foot yes	Asplanchna-type	7
Polyarthra	Synchaetidae	planktonic or semi-planktonic	virgate	illoricate	defence yes	foot no	Asplanchna-type	8
Pompholyx	Testudinellidae	planktonic or semi-planktonic	malleoramate	loricate	defence no	foot no	Hexarthra-type	7
Pourriotia	Notommatidae	endobiont	virgate	illoricate	defence no	foot yes	Notommata-type	4
Proales	Proalidae	planktonic or semi-planktonic	malleate	illoricate	defence no	foot yes	Notommata-type	3
Proalides	Epiphanidae	littoral, periphytic	malleate	illoricate	defence no	foot yes	Euchlanis-Brachionus-type	6
Proalinopsis	Proalidae	littoral, periphytic	virgate	illoricate	defence no	foot yes	Notommata-type	3
Pseudoeuchlanis	Euchlanidae	littoral, periphytic	malleate	illoricate	defence no	foot yes	Euchlanis-Brachionus-type	6
Pseudoharringia	Notommatidae	littoral, periphytic	virgate	illoricate	defence no	foot yes	Notommata-type	3
Pseudoploesoma	Notommatidae	littoral, periphytic	virgate	loricate	defence no	foot yes	Notommata-type	3
Ptygura	Flosculariidae	littoral, periphytic	malleoramate	illoricate	defence no	foot no	Hexarthra-type	5
Pulchritia	Trichotriidae	planktonic or semi-planktonic	malleate	loricate	defence yes	foot yes	Euchlanis-Brachionus-type	6
Resticula	Notommatidae	littoral, periphytic	virgate	illoricate	defence no	foot yes	Notommata-type	3
Rhinoglena	Epiphanidae	planktonic or semi-planktonic	malleate	illoricate	defence no	foot yes	Euchlanis-Brachionus-type	6
Rotaria	Philodinidae	planktonic or semi-planktonic	ramate	illoricate	defence no	foot yes	Philodina-type	1
Rousseletia	Notommatidae	littoral, periphytic	virgate	illoricate	defence no	foot yes	Notommata-type	3
Scaridium	Scaridiidae	littoral, periphytic	virgate	loricate	defence no	foot yes	Notommata-type	3
Scepanotrocha	Habrotrochidae	littoral, periphytic	ramate	illoricate	defence no	foot yes	Philodina-type	1
Seison	Seisonidae	epibiont	fulcrate	illoricate	defence no	foot yes	Seisonid-type	1
Sinantherina	Flosculariidae	littoral, periphytic	malleoramate	illoricate	defence yes	foot yes	Hexarthra-type	5
Sphyrias	Notommatidae	littoral, periphytic	virgate	illoricate	defence no	foot yes	Notommata-type	3
Squatinella	Lepadellidae	littoral, periphytic	malleate	loricate	defence yes	foot yes	Euchlanis-Brachionus-type	6
Stephanoceros	Collothecidae	littoral, periphytic	uncinate	illoricate	defence yes	foot yes	Collotheca-type	2
Streptognatha	Dicranophoridae	littoral, periphytic	forcipate	illoricate	defence no	foot yes	Notommata-type	3
Synchaeta	Synchaetidae	planktonic or semi-planktonic	virgate	illoricate	defence no	foot yes	Asplanchna-type	9
Taphrocampa	Notommatidae	littoral, periphytic	virgate	illoricate	defence no	foot yes	Notommata-type	3
Testudinella	Testudinellidae	littoral, periphytic	malleoramate	illoricate	defence no	foot yes	Hexarthra-type	5
Tetrasiphon	Tetrasiphonidae	littoral, periphytic	virgate	illoricate	defence no	foot yes	Notommata-type	3
Trichocerca	Trichocercidae	planktonic or semi-planktonic	virgate	loricate	defence no	foot yes	Asplanchna-type	7
Trichotria	Trichotriidae	littoral, periphytic	malleate	loricate	defence yes	foot yes	Euchlanis-Brachionus-type	6
Tripleuchlanis	Euchlanidae	littoral, periphytic	malleate	loricate	defence no	foot yes	Euchlanis-Brachionus-type	6
Trochosphaera	Trochosphaeridae	planktonic or semi-planktonic	malleoramate	illoricate	defence no	foot no	Conochilus-type	10
Tylotrocha	Notommatidae	planktonic or semi-planktonic	virgate	illoricate	defence yes	foot yes	Notommata-type	9
Wierzejskiella	Dicranophoridae	littoral, periphytic	forcipate	loricate	defence no	foot yes	Notommata-type	3
Wigrella	Dicranophoridae	littoral, periphytic	forcipate	illoricate	defence no	foot yes	Notommata-type	3
Wolga	Trichotriidae	littoral, periphytic	malleate	loricate	defence yes	foot yes	Euchlanis-Brachionus-type	6
Wulfertia	Proalidae	littoral, periphytic	malleate	illoricate	defence no	foot yes	Notommata-type	3
Zelinkiella	Philodinidae	epibiont	ramate	illoricate	defence no	foot no	Philodina-type	1
